# Supplementary material
Source: Springer Nature journal article supplement (https://www.springermedizin.de/resource/supplementary/12967_2006_158_MOESM1_ESM.pdf/9575832)

**I**

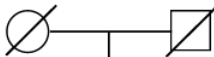

**II**

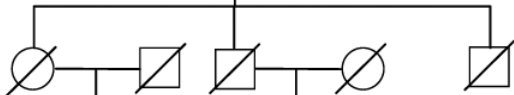

**III**

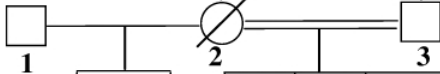

**IV**

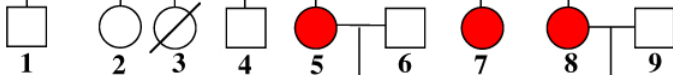

**V**

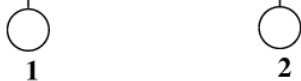

Supplement: MOESM1 [file 9575832]
